# Supplementary material for: B2C3N monolayers with high theoretical capacity as anode materials for lithium-ion batteries: first-principles calculations
Source: Royal Society of Chemistry journal article supplement (doi:10.1039/d4cp03717k), 2025-01-01
Supplement: d4cp03717k1.pdf [file d4cp03717k1.pdf]

## Supporting Information

### **B<sub>2</sub>C<sub>3</sub>N Monolayer with high theoretical capacity as Anode Materials for Lithium-Ion Batteries: A First-Principles Calculations**

Yutong Zou,<sup>1</sup> Yaqi She,<sup>1</sup> Liuxu Zhao,<sup>1</sup> Ailing Liu,<sup>1</sup> Bo Sun,<sup>1</sup> Yuhong Jiang,<sup>2</sup> Chunlei Kou,<sup>\*1</sup>

Miao Zhang,<sup>\*1</sup> Yuanye Tian<sup>\*1</sup>

<sup>1</sup>*School of Sciences, Beihua University, Jilin 132013, China*

<sup>2</sup>*Key Laboratory of Functional Materials Physics and Chemistry of the Ministry of Education,*

*Jilin Normal University, Changchun, 130103, China*

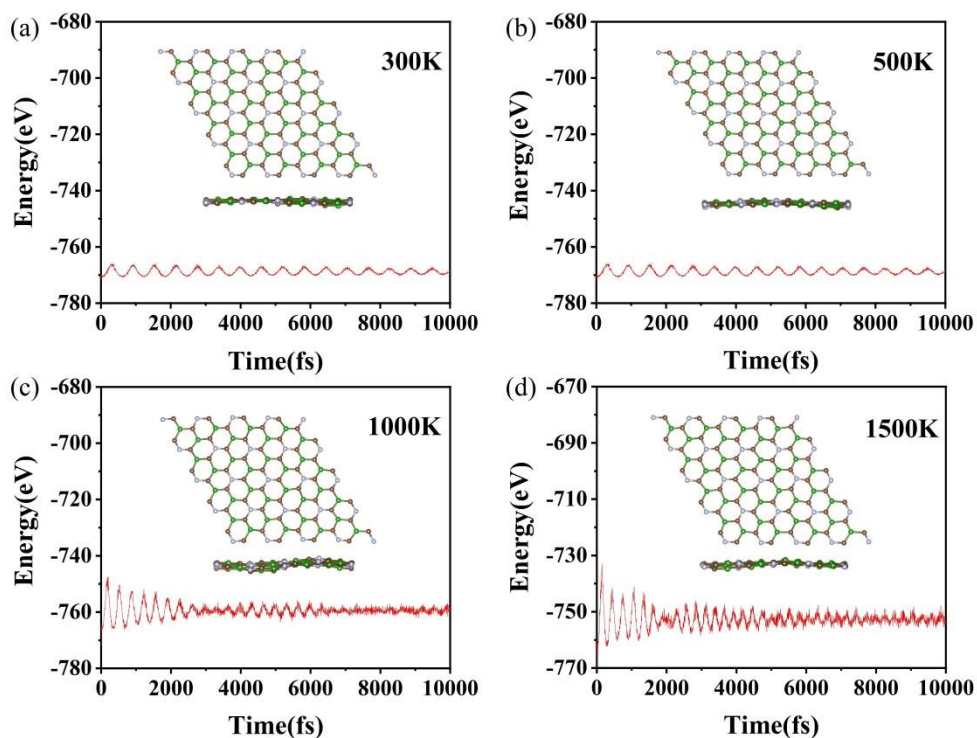

**Fig. S1.** Molecular dynamics simulations of B<sub>2</sub>C<sub>3</sub>N monolayer at (a) 300K, (b) 500K, (C) 1000K, and (b) 1500K, respectively.

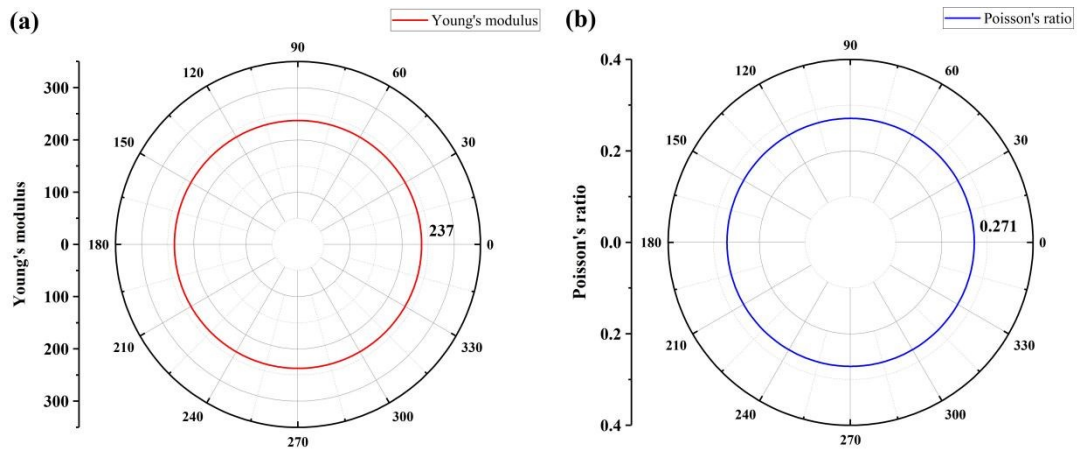

**Fig. S2.** Angle-dependent (a) Young's modulus and (b) Poisson's ratio of  $B_2C_3N$  monolayer.

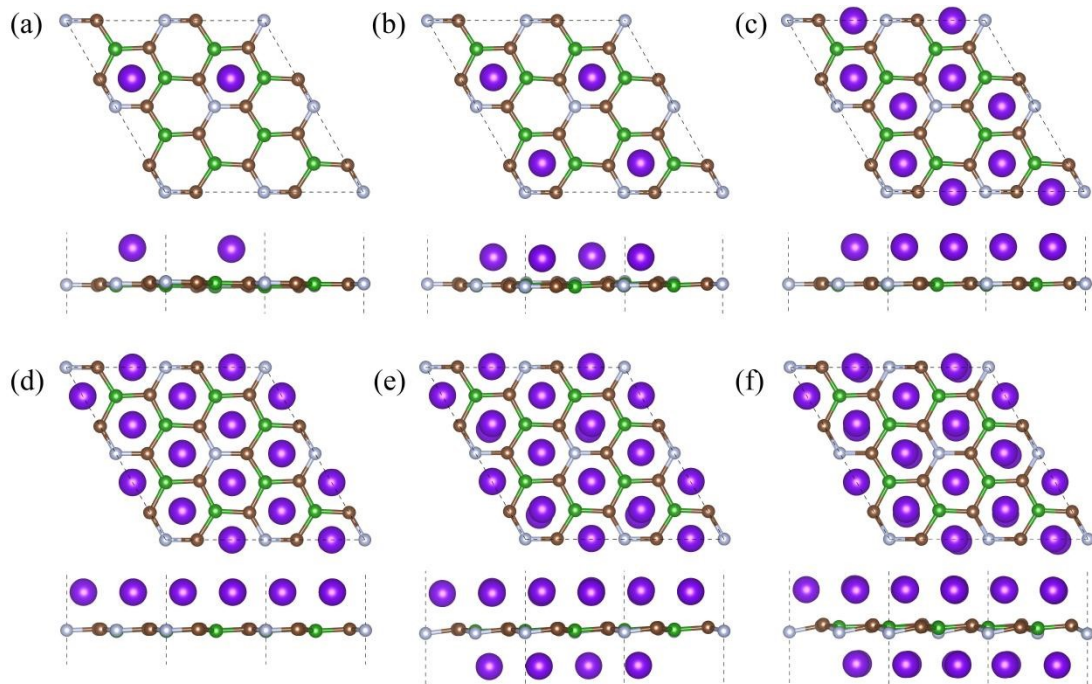

**Fig. S3.** Top and side view structural diagrams of  $B_2C_3N$  at different Li-ion concentrations: (a)  $B_2C_3NLi_{0.5}$ , (b)  $B_2C_3NLi_1$ , (c)  $B_2C_3NLi_2$ , (d)  $B_2C_3NLi_3$ , (e)  $B_2C_3NLi_4$ , (f)  $B_2C_3NLi_5$ .

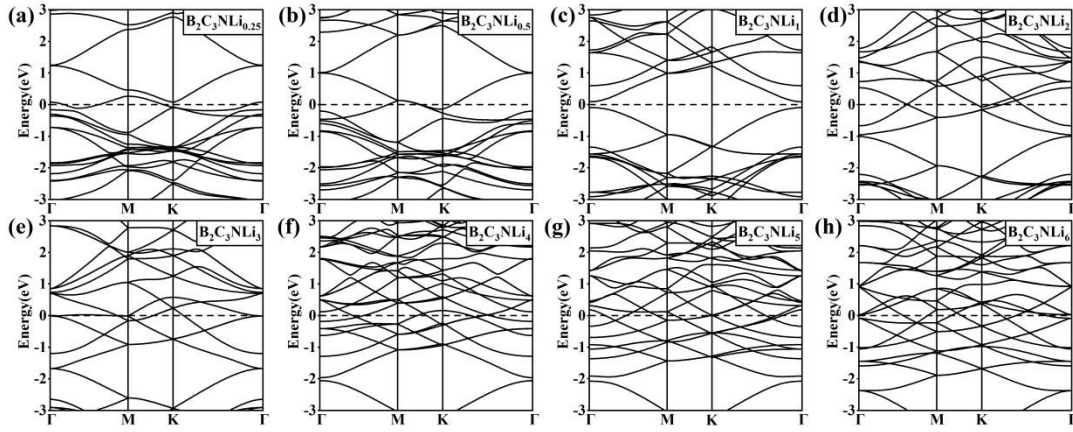

**Fig. S4.** Band structure diagrams of  $B_2C_3N$  with varying Li-ion concentrations: (a)  $B_2C_3NLi_{0.25}$ , (b)  $B_2C_3NLi_{0.5}$ , (c)  $B_2C_3NLi_1$ , (d)  $B_2C_3NLi_2$ , (e)  $B_2C_3NLi_3$ , (f)  $B_2C_3NLi_4$ , (g)  $B_2C_3NLi_5$ , (h)  $B_2C_3NLi_6$ .

**Table SI.** Average adsorption energy, average Bader charge transfer, lattice constant  $a$ , percentage change in lattice constant  $a$ , and volume expansion rate of  $B_2C_3N$  at various Li-ion concentrations.

| Name               | Average adsorption energy (eV) | Average Bader charge (e) | Lattice constant $a$ (Å) | % change in lattice constant $a$ | Volume expansion rate |
|--------------------|--------------------------------|--------------------------|--------------------------|----------------------------------|-----------------------|
| $B_2C_3NLi_{0.25}$ | -1.640                         | -0.92                    | 8.919                    | 0.15%                            | 0.29%                 |
| $B_2C_3NLi_{0.5}$  | -1.634                         | -0.89                    | 8.934                    | 0.31%                            | 0.62%                 |
| $B_2C_3NLi_1$      | -1.382                         | -0.88                    | 8.976                    | 0.79%                            | 1.58%                 |
| $B_2C_3NLi_2$      | -0.581                         | -0.70                    | 8.994                    | 0.98%                            | 1.98%                 |
| $B_2C_3NLi_3$      | -0.347                         | -0.73                    | 9.092                    | 2.08%                            | 4.21%                 |
| $B_2C_3NLi_4$      | -0.258                         | -0.75                    | 9.167                    | 2.93%                            | 5.94%                 |
| $B_2C_3NLi_5$      | -0.173                         | -0.73                    | 9.212                    | 3.43%                            | 6.98%                 |
| $B_2C_3NLi_6$      | -0.134                         | -0.73                    | 9.296                    | 4.38%                            | 8.94%                 |

**Table SII.** Structural information for  $B_2C_3N$  monolayer.

| Name      | Space group | Lattice parameters (Å) | Atomic positions                 |
|-----------|-------------|------------------------|----------------------------------|
| $B_2C_3N$ | $P-62m$     | $a = b = 4.454$        | C 3g (0.31369, 0.00000, 0.50000) |
|           |             |                        | B 2d (0.66667, 0.33333, 0.50000) |
|           |             |                        | N 1b (0.00000, 0.00000, 0.50000) |
